# Supplementary material for: Noble 3,4-Seco-triterpenoid Glycosides from the Fruits of Acanthopanax sessiliflorus and Their Anti-Neuroinflammatory Effects
Source: MDPI journal article supplement (doi:10.3390/antiox10091334), 2021-08-24

# Noble 3,4-seco-Triterpenoid Glycosides from the Fruits of *Acanthopanax sessiliflorus* and their Anti-Neuroinflammatory Effects

Bo-Ram Choi <sup>1,2†</sup>, Hyoung-Geun Kim <sup>2†</sup>, Wonmin Ko <sup>3</sup>, Linsha Dong <sup>3</sup>, Dahye Yoon <sup>1</sup>, Seon Min Oh <sup>1,2</sup>, Young-Seob Lee <sup>1</sup>, Dong-Sung Lee <sup>3</sup>, Nam-In Baek <sup>2</sup>, and Dae Young Lee <sup>1,\*</sup>

<sup>1</sup> Department of Herbal Crop Research, National Institute of Horticultural and Herbal Science, RDA, Eumseong 27709, Republic of Korea; bmcbr@korea.kr (B.-R.C); dahyeyoon@korea.kr (D.Y); youngseobleee@korea.kr (Y.-S.L.)

<sup>2</sup> Graduate School of Biotechnology and Department of Oriental Medicinal Biotechnology, Kyung Hee University, Yongin 17104, Korea; zwang05@khu.ac.kr (H.-G.K.); nibaek@khu.ac.kr (N.-I.B.)

<sup>3</sup> College of Pharmacy, Chosun University, Dong-gu, Gwangju, Republic of Korea; rabis815@naver.com (W.K.); donglinsha011@163.com (L.D); dslee2771@chosun.ac.kr (D.-S.L.)

\* Correspondence: dylee0809@gmail.com; Tel.: +82-43-871-5784

† Co-first author, these authors contributed equally to this work

## Contents:

S1: <sup>1</sup>H, <sup>13</sup>C NMR, Qtrap/MSMS, and HRESIMS of Acanthosessilioside G

S2: <sup>1</sup>H, <sup>13</sup>C NMR, Qtrap/MSMS, and HRESIMS of Acanthosessilioside H

S3: <sup>1</sup>H, <sup>13</sup>C NMR, Qtrap/MSMS, and HRESIMS of Acanthosessilioside I

S4: <sup>1</sup>H, <sup>13</sup>C NMR, Qtrap/MSMS, and HRESIMS of Acanthosessilioside J

S5: <sup>1</sup>H, <sup>13</sup>C NMR, Qtrap/MSMS, and HRESIMS of Acanthosessilioside K

S6: <sup>1</sup>H, <sup>13</sup>C NMR, Qtrap/MSMS, and HRESIMS of Acanthosessilioside L

S7: <sup>1</sup>H, <sup>13</sup>C NMR, Qtrap/MSMS, and HRESIMS of Acanthosessilioside M

S8: <sup>1</sup>H, <sup>13</sup>C NMR, Qtrap/MSMS, and HRESIMS of Acanthosessilioside N

S9: <sup>1</sup>H, <sup>13</sup>C NMR, Qtrap/MSMS, and HRESIMS of Acanthosessilioside O

# S1: $^1\text{H}$ , $^{13}\text{C}$ NMR, Qtrap/MSMS, and HRESIMS of Acanthosessilioside G

## $^1\text{H}$ NMR of Acanthosessilioside G

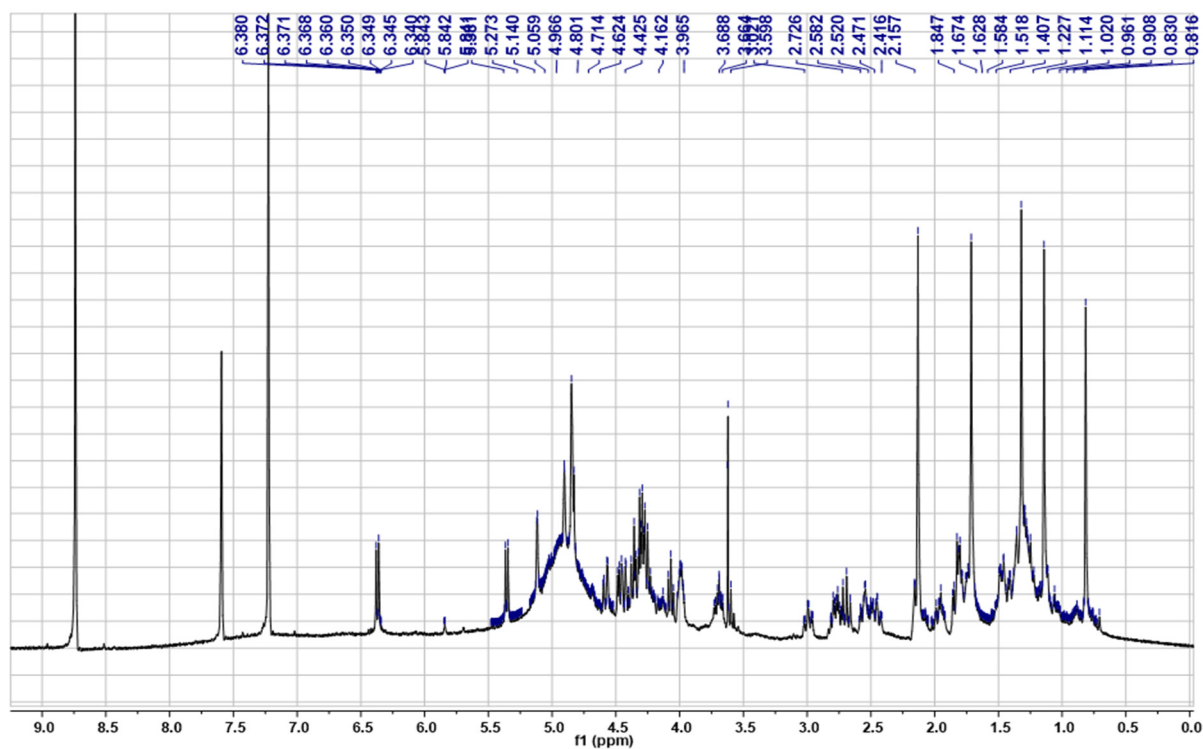

## $^{13}\text{C}$ NMR of Acanthosessilioside G

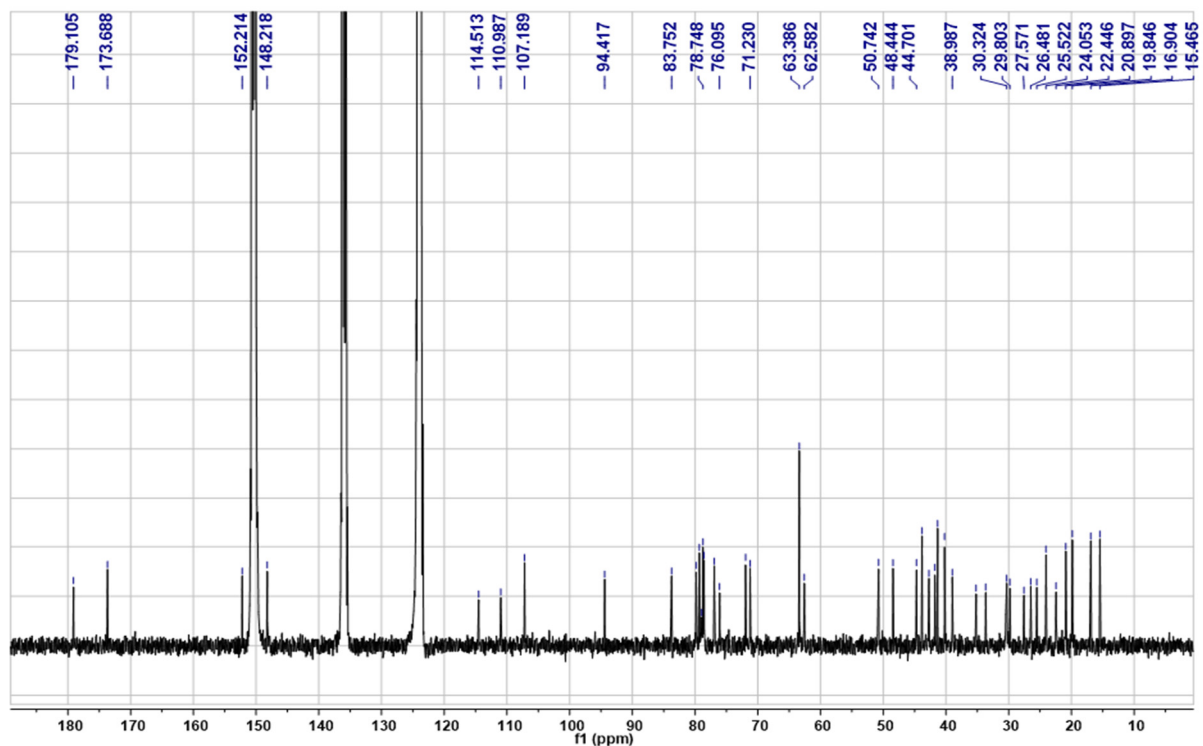

## Qtrap/MSMS of Acanthosessilioside G

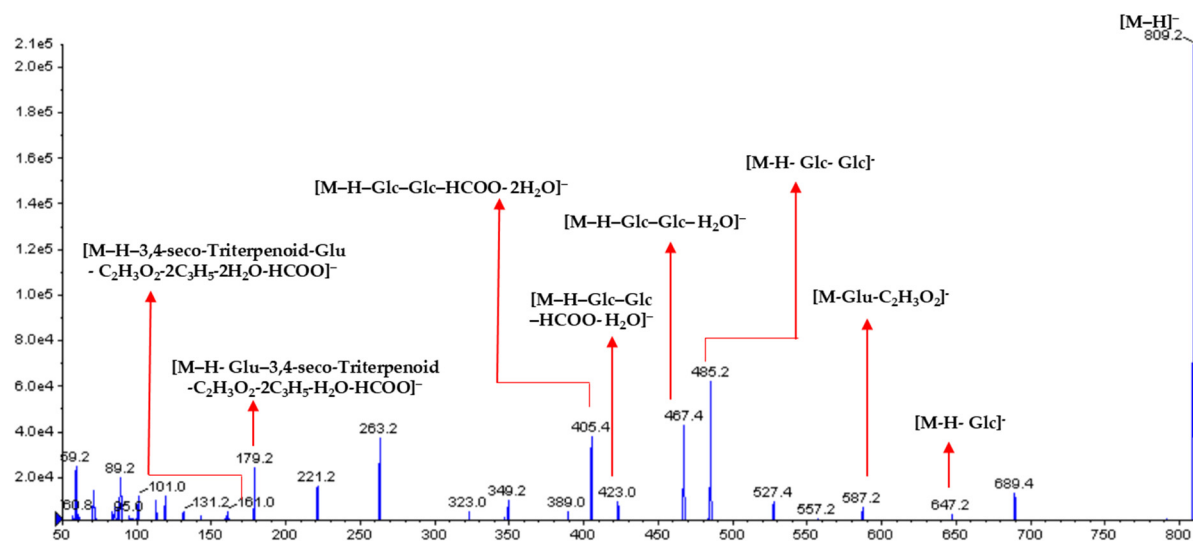

## HRESIMS of Acanthosessilioside G

Acanthopanax\_25ppm\_B5

Acanthopanax\_25ppm\_B5\_346 (6.388)

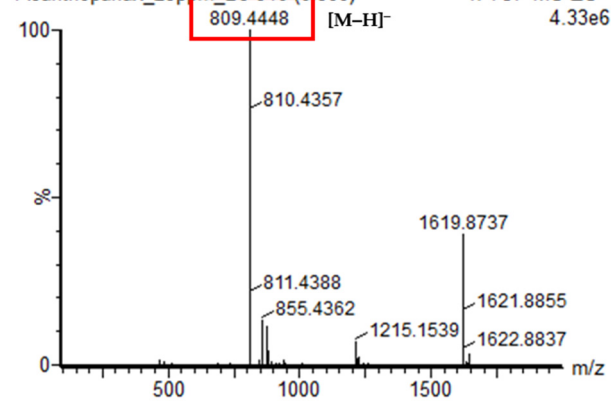

S2:  $^1\text{H}$ ,  $^{13}\text{C}$  NMR, Qtrap/MSMS, and HRESIMS of Acanthosessilioside H

$^1\text{H}$  NMR of Acanthosessilioside H

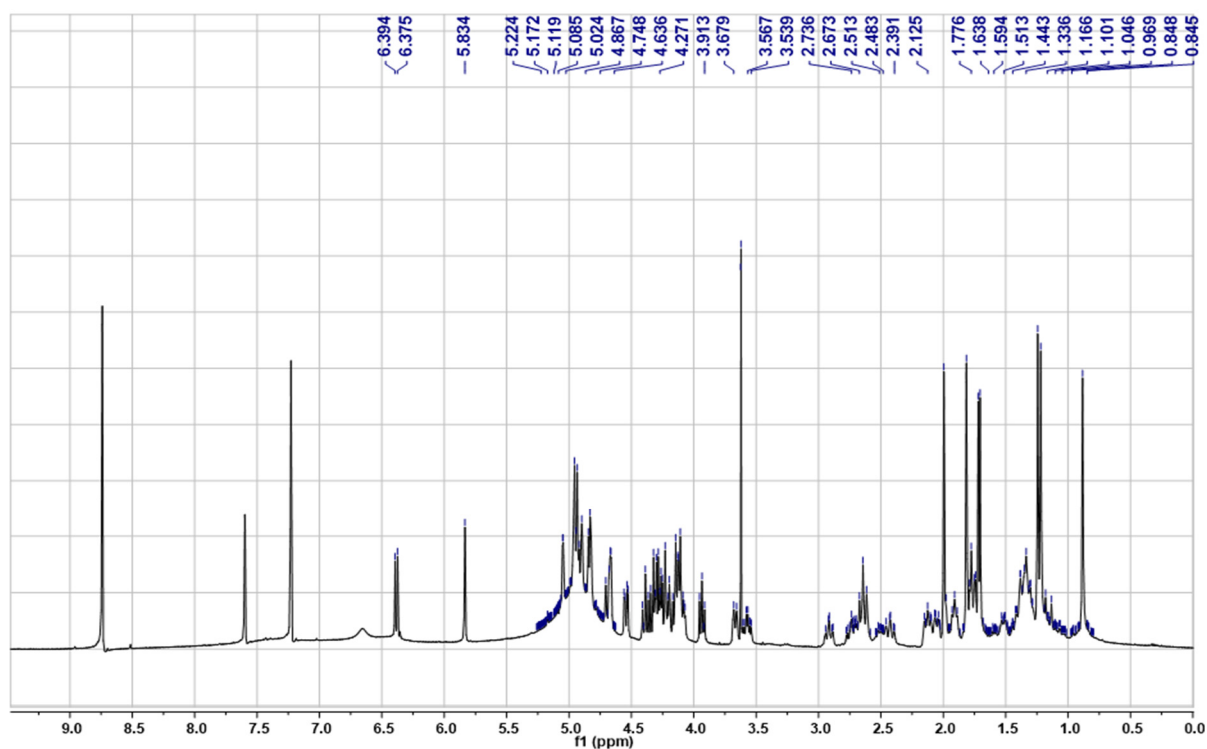

$^{13}\text{C}$  NMR of Acanthosessilioside H

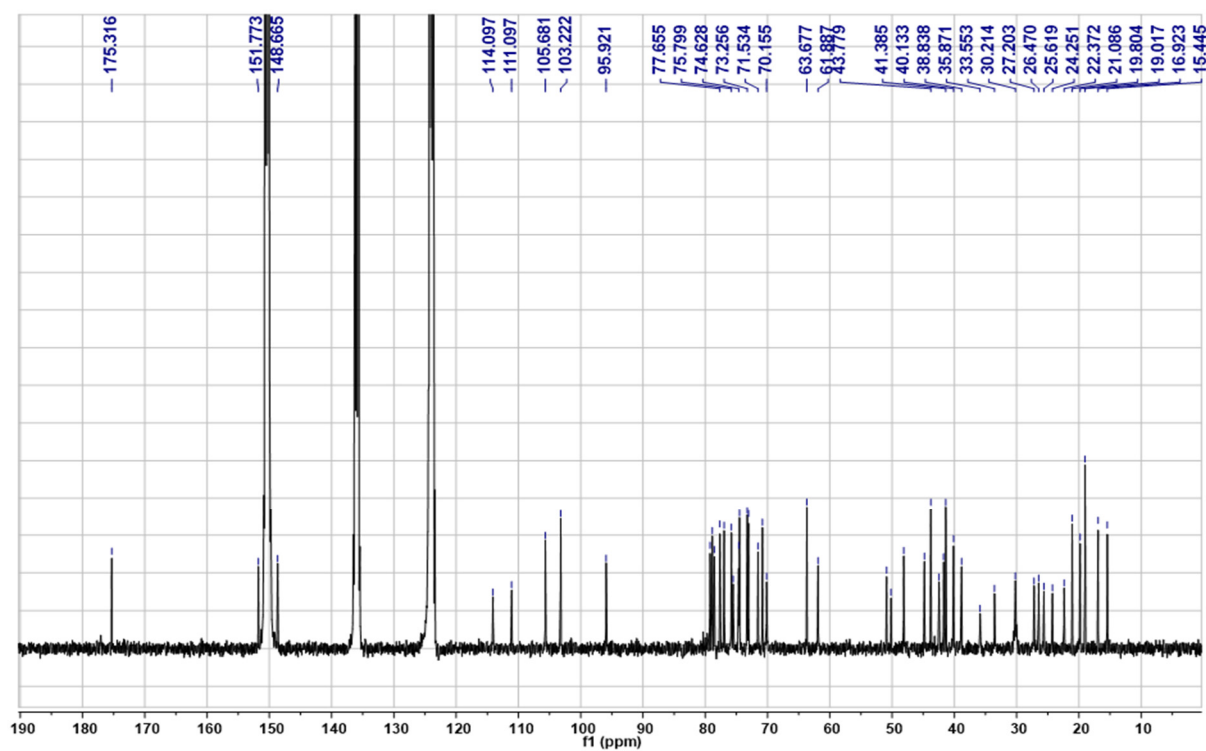

## Qtrap/MSMS of Acanthosessilioside H

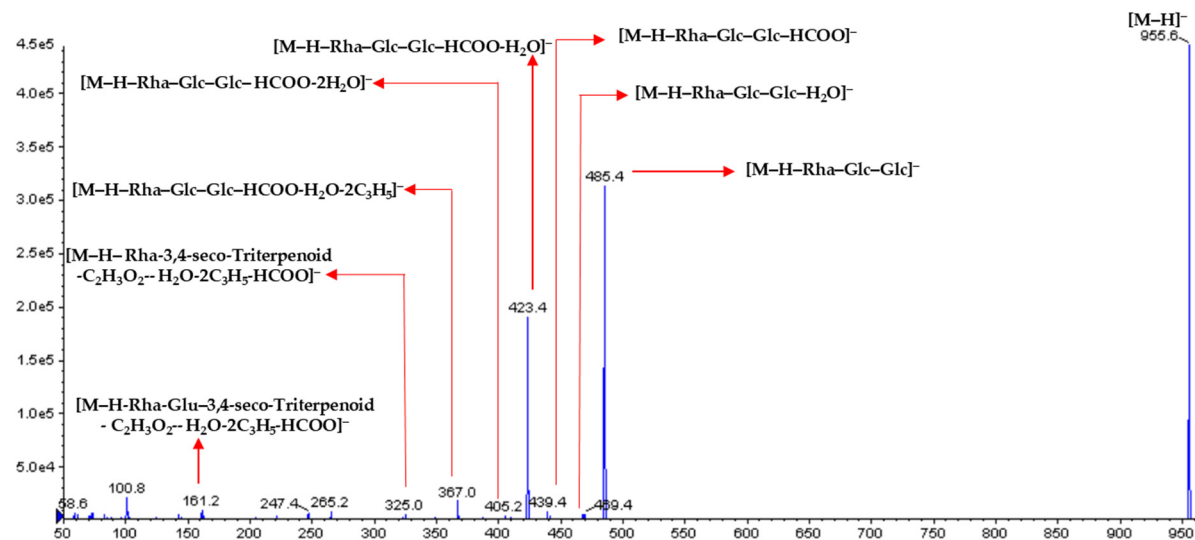

## HRESIMS of Acanthosessilioside H

Acanthopanax\_25ppm\_B6

Acanthopanax\_25ppm\_B6 346 (6 388)

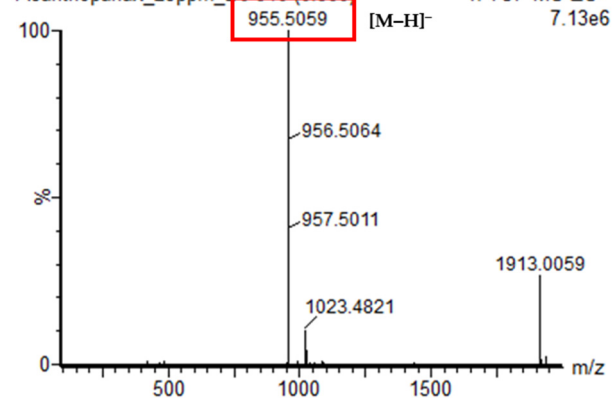

### S3: $^1\text{H}$ , $^{13}\text{C}$ NMR, Qtrap/MSMS, and HRESIMS of Acanthosessilioside I

#### $^1\text{H}$ NMR of Acanthosessilioside I

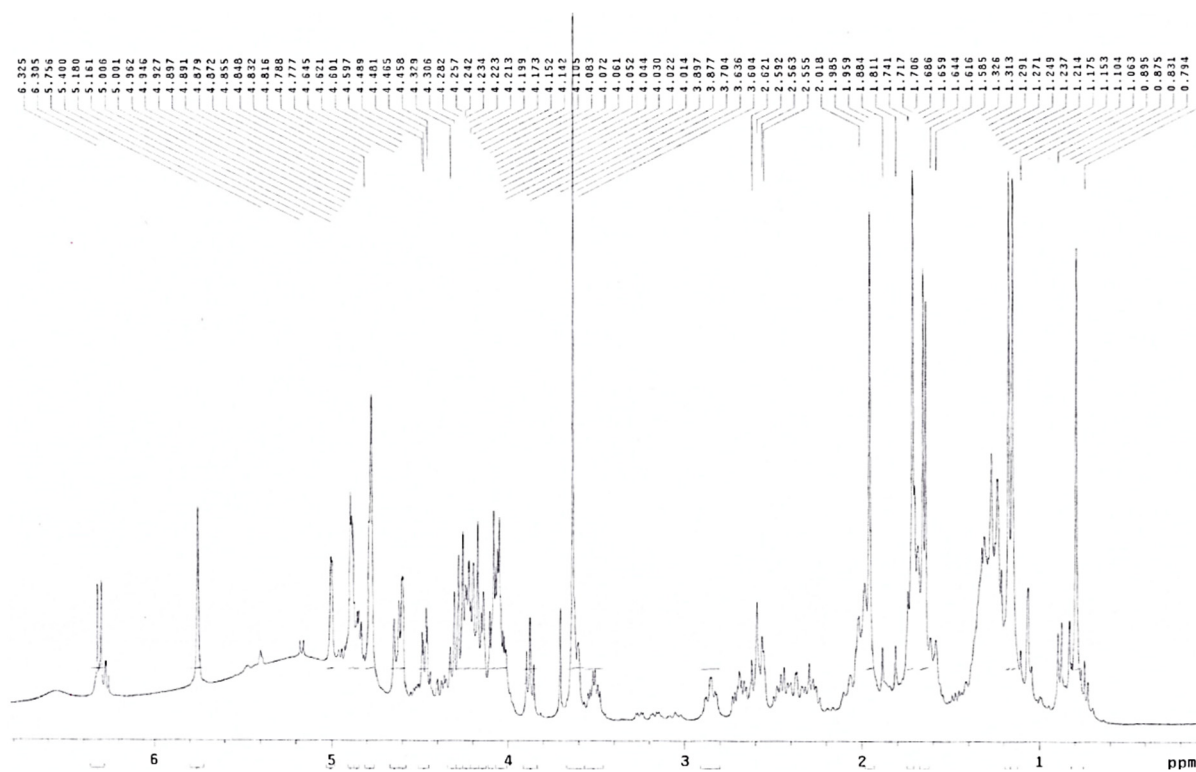

#### $^{13}\text{C}$ NMR of Acanthosessilioside I

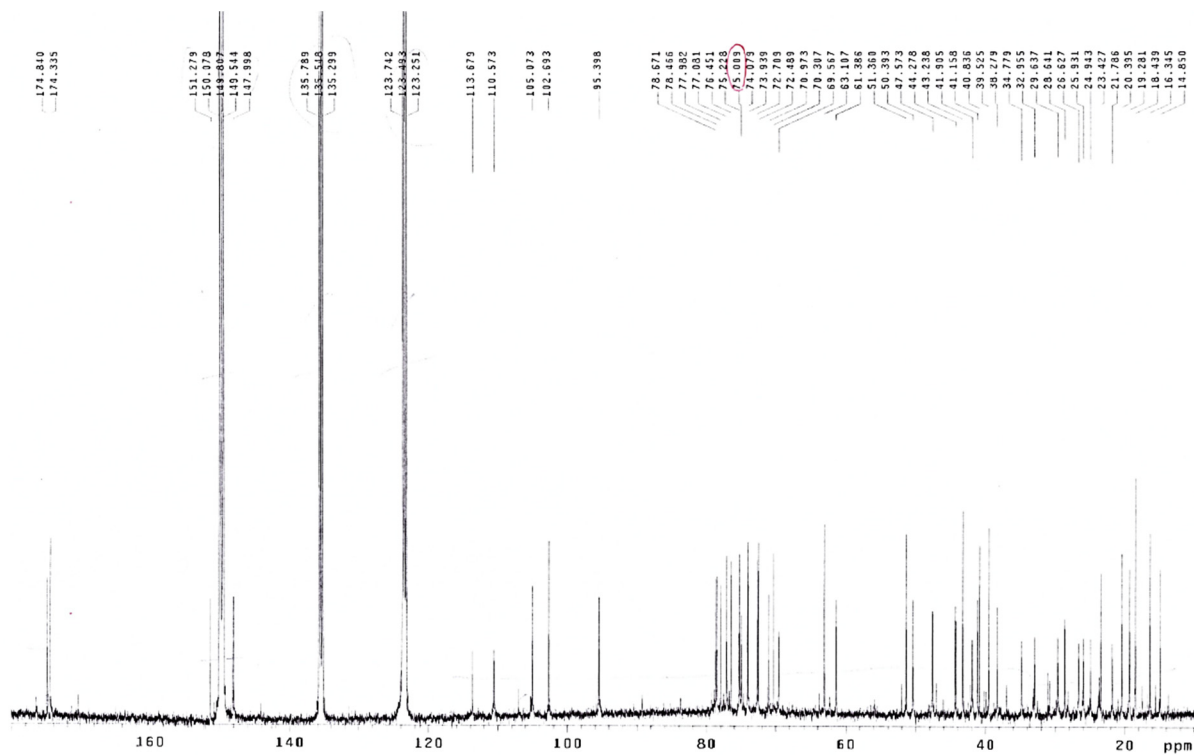

## Qtrap/MSMS of Acanthosessilioside I

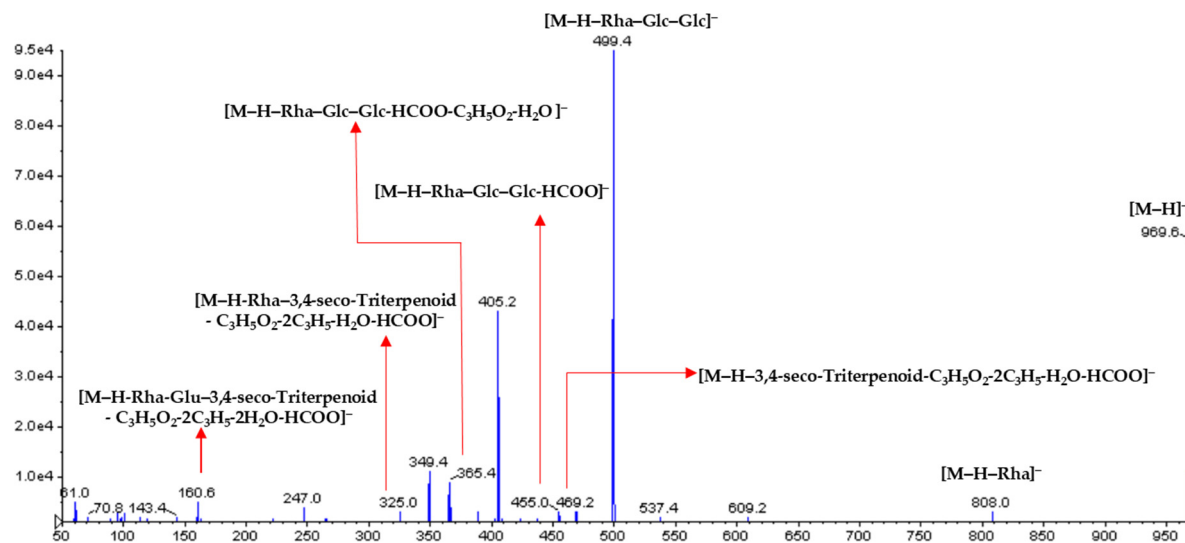

## HRESIMS of Acanthosessilioside I

Acanthopanax\_25ppm\_B1

Acanthopanax\_25ppm\_B1 545 (10.052) Cm (545) 1: TOF MS ES-  
1015.5237  $[M+HCOO]^-$  6.95e6

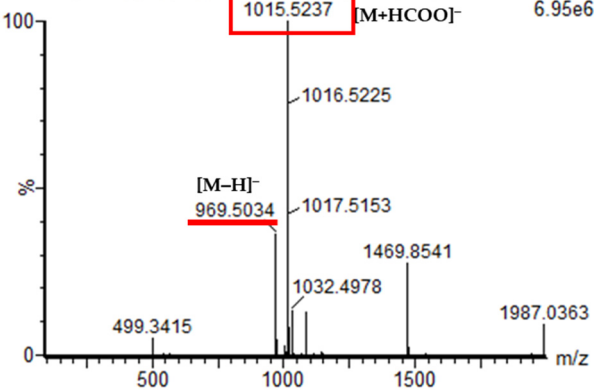

# S4: $^1\text{H}$ , $^{13}\text{C}$ NMR, Qtrap/MSMS, and HRESIMS of Acanthosessilioside J

## $^1\text{H}$ NMR of Acanthosessilioside J

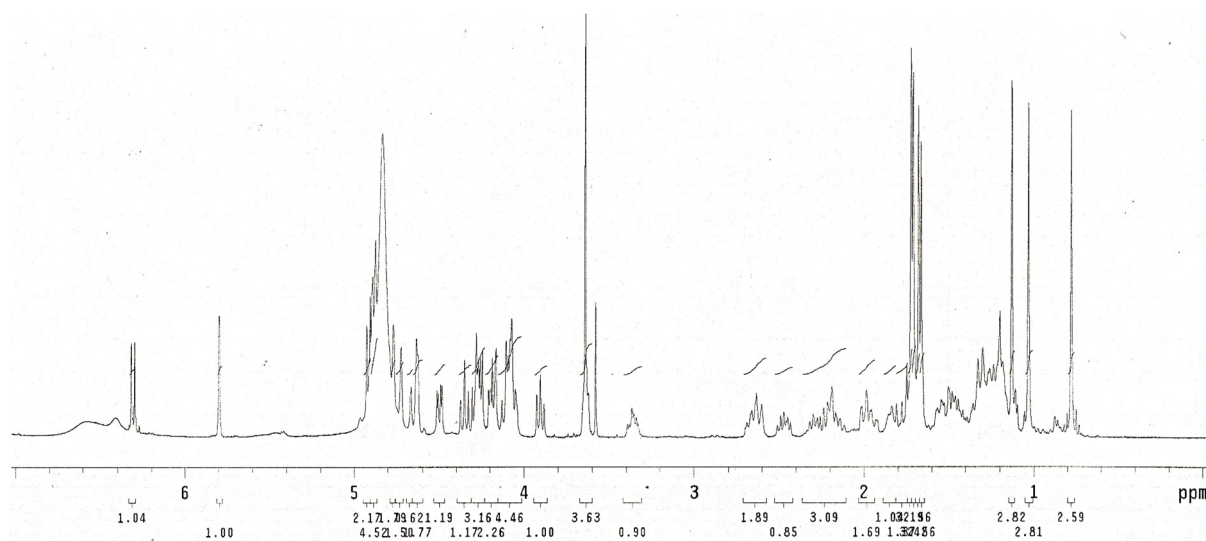

## $^{13}\text{C}$ NMR of Acanthosessilioside J

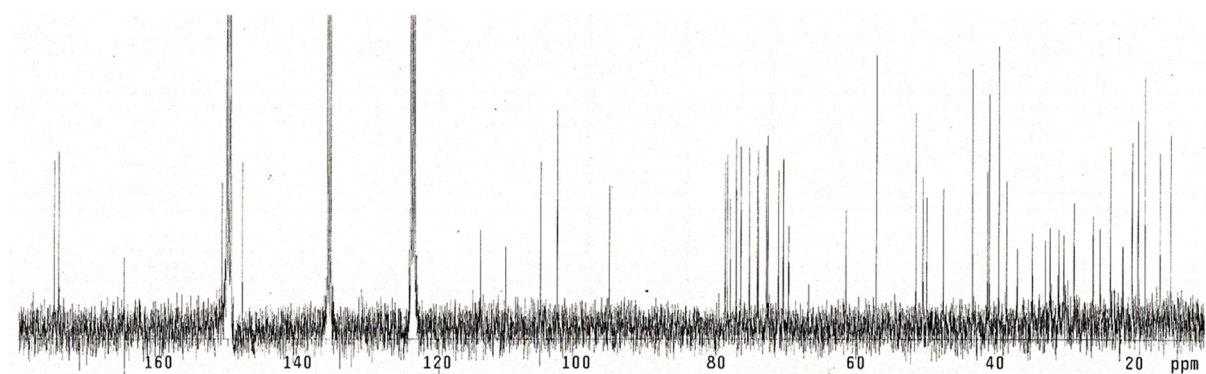



## Qtrap/MSMS of Acanthosessilioside J

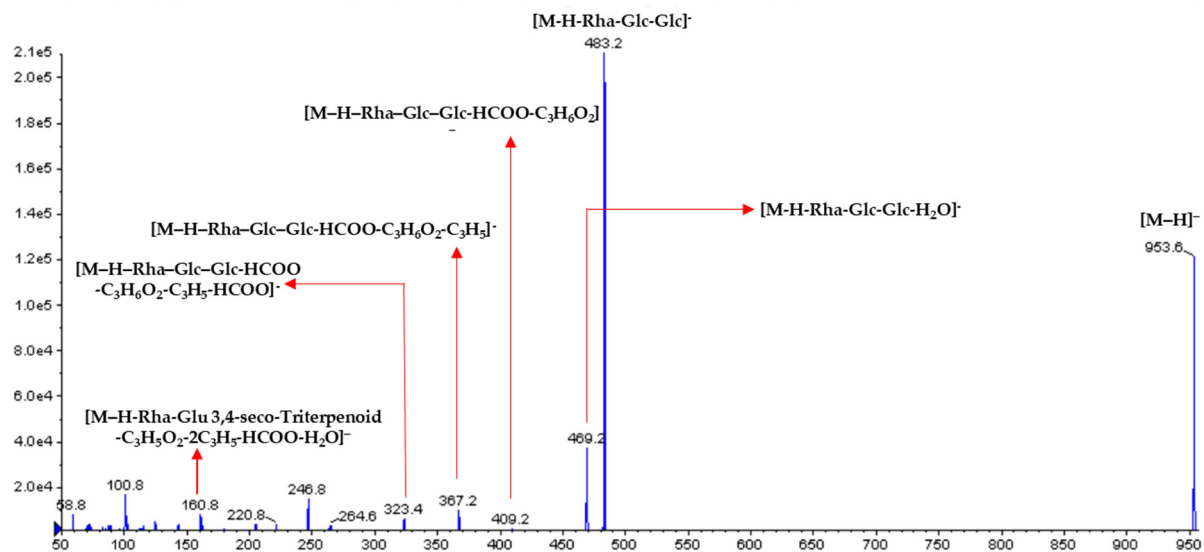

## HRESIMS of Acanthosessilioside J

Acanthopanax\_25ppm\_B3

Acanthopanax\_25ppm\_B3 646 (11.910)

1: TOF MS ES- 6.85e6

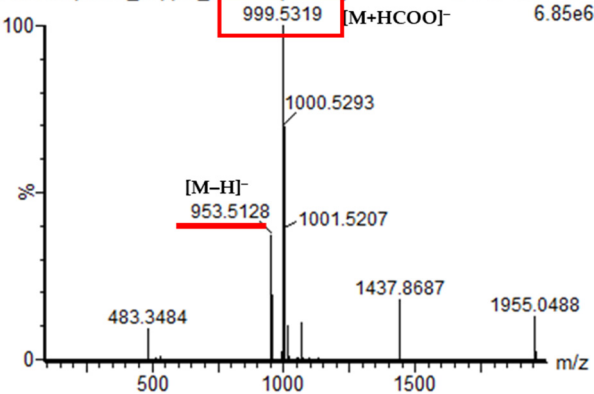

# S5: $^1\text{H}$ , $^{13}\text{C}$ NMR, Qtrap/MSMS, and HRESIMS of Acanthosessilioside K

## $^1\text{H}$ NMR of Acanthosessilioside K

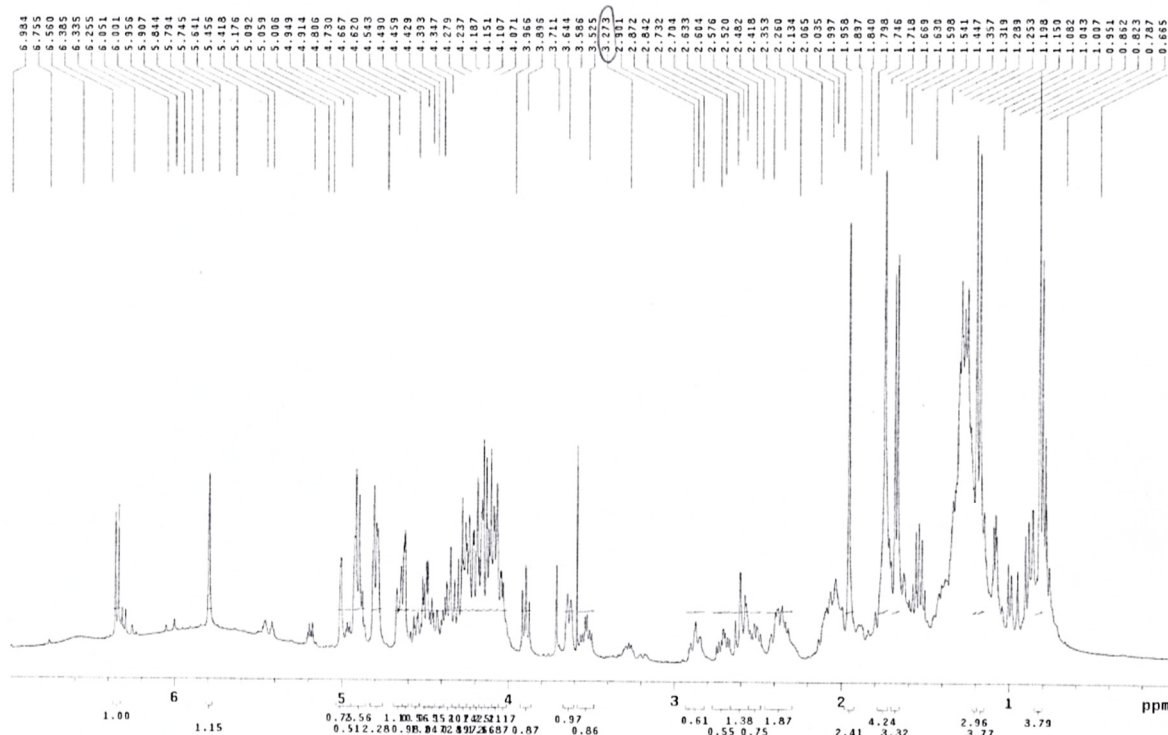

## $^{13}\text{C}$ NMR of Acanthosessilioside K

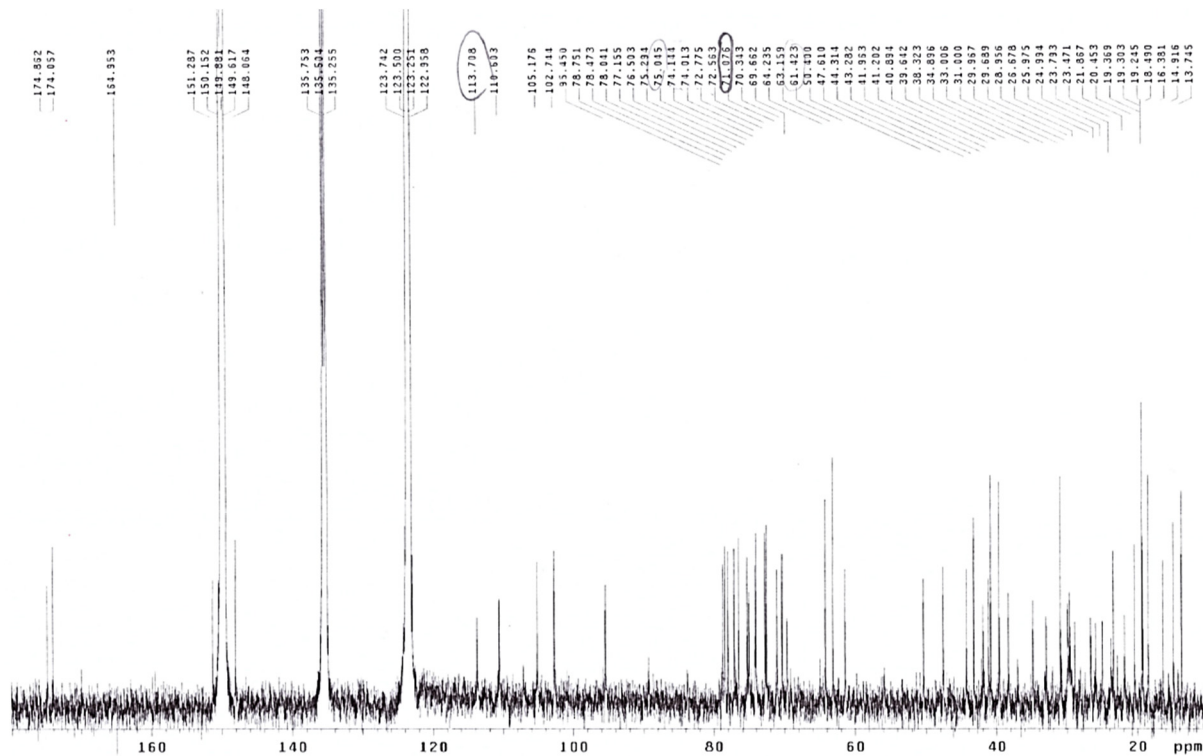

## Qtrap/MSMS of Acanthosessilioside K

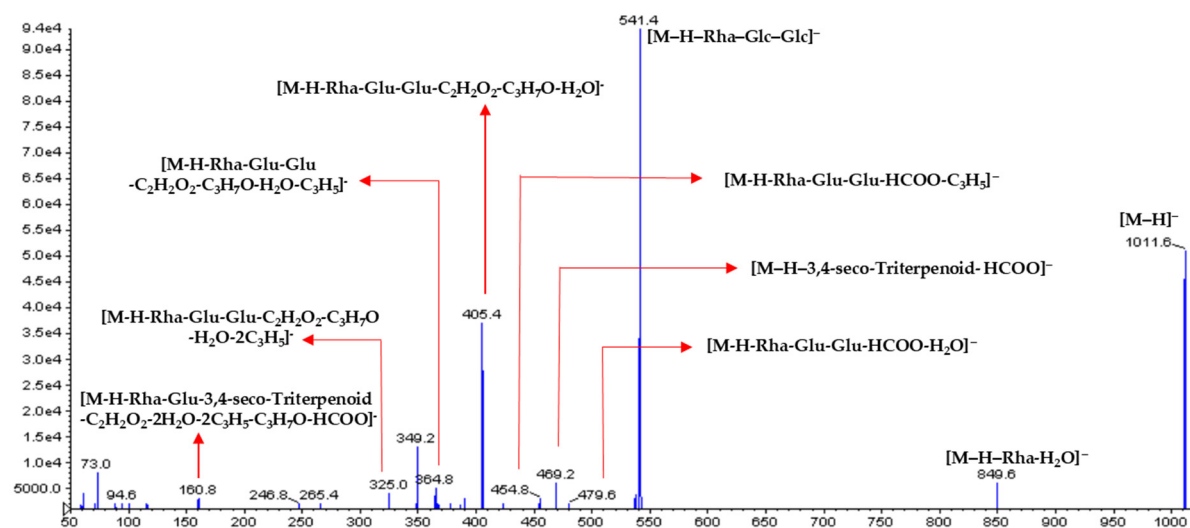

## HRESIMS of Acanthosessilioside K

Acanthopanax\_25ppm\_B9

Acanthopanax\_25ppm\_B9 714 (13 168) 1: TOF MS ES- 2.97e6

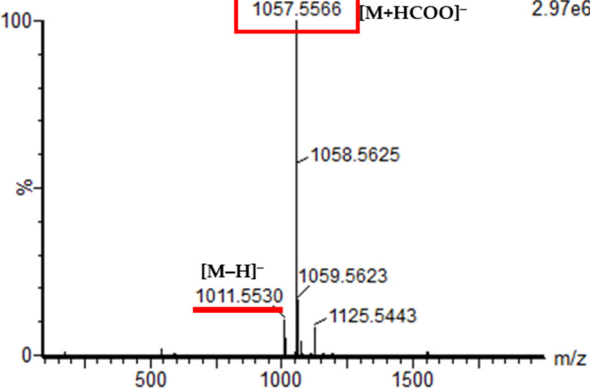

# S6: $^1\text{H}$ , $^{13}\text{C}$ NMR, Qtrap/MSMS, and HRESIMS of Acanthosessilioside L

## $^1\text{H}$ NMR of Acanthosessilioside L

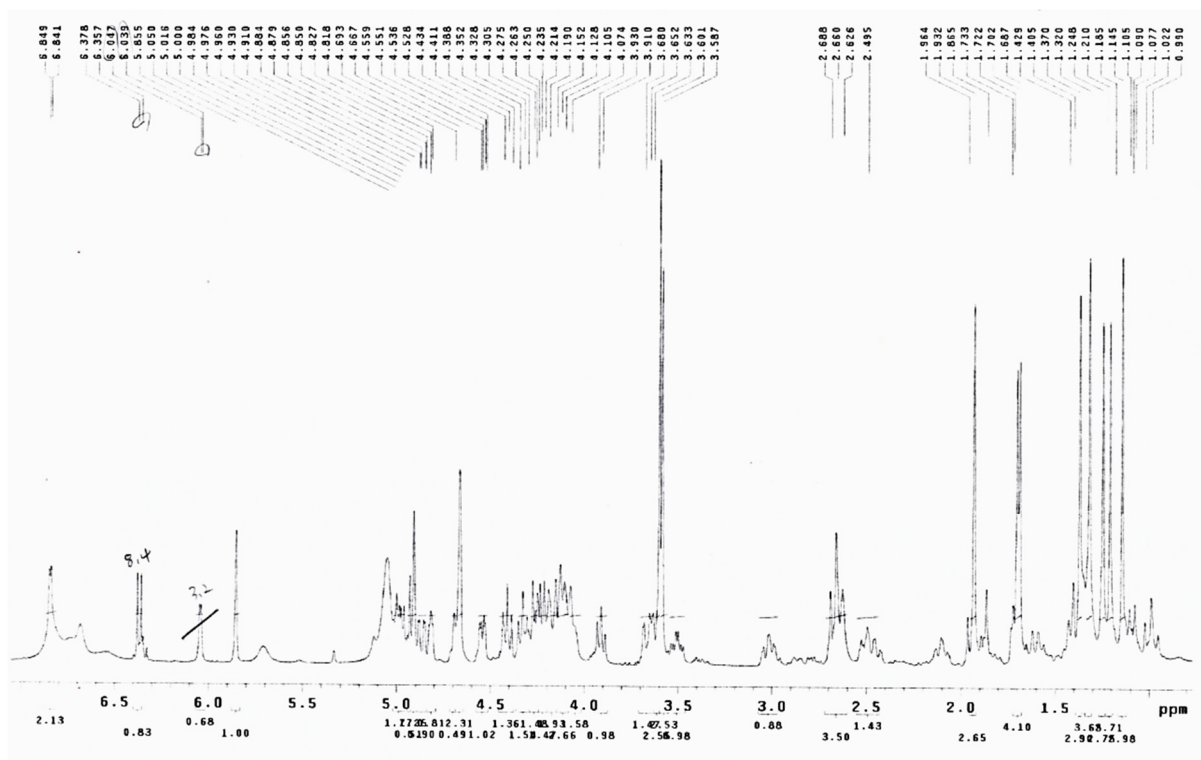

## $^{13}\text{C}$ NMR of Acanthosessilioside L

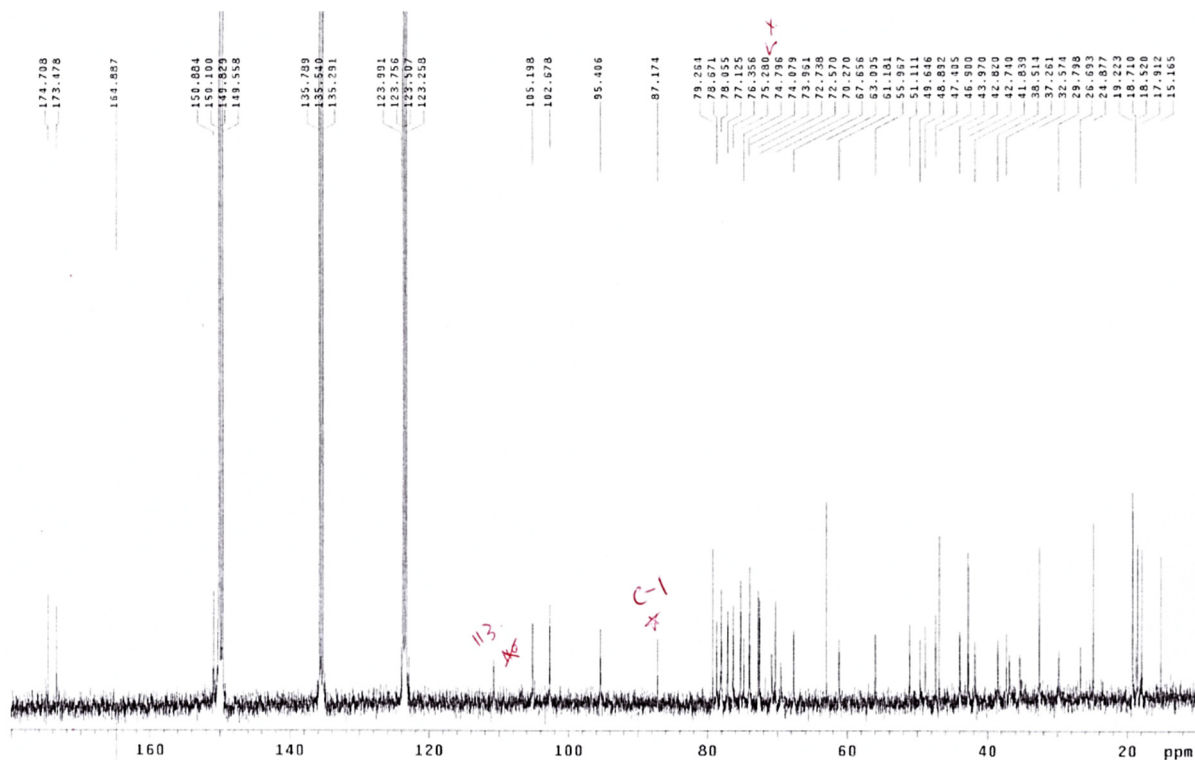

## Qtrap/MSMS of Acanthosessilioside L

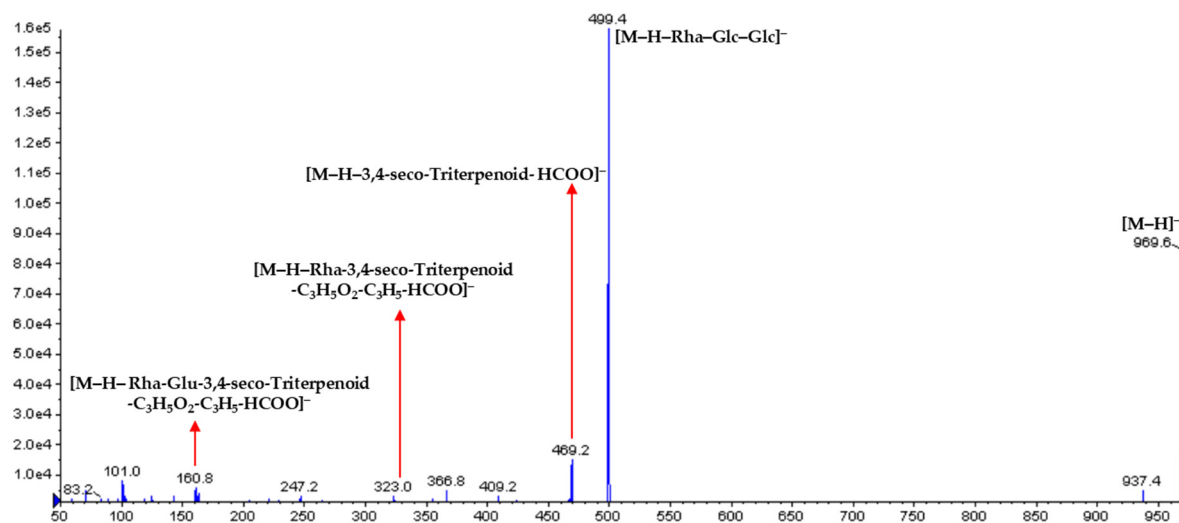

## HRESIMS of Acanthosessilioside L

Acanthopanax\_25ppm\_B8

Acanthopanax\_25ppm\_B8 515 (9.504)

1: TOF MS ES-

4.57e6

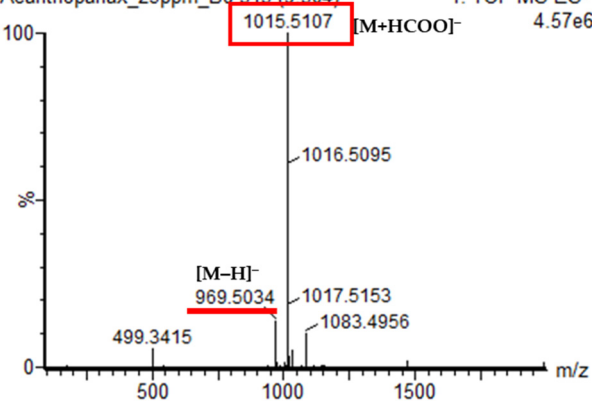

# S7: $^1\text{H}$ , $^{13}\text{C}$ NMR, Qtrap/MSMS, and HRESIMS of Acanthosessilioside M

## $^1\text{H}$ NMR of Acanthosessilioside M

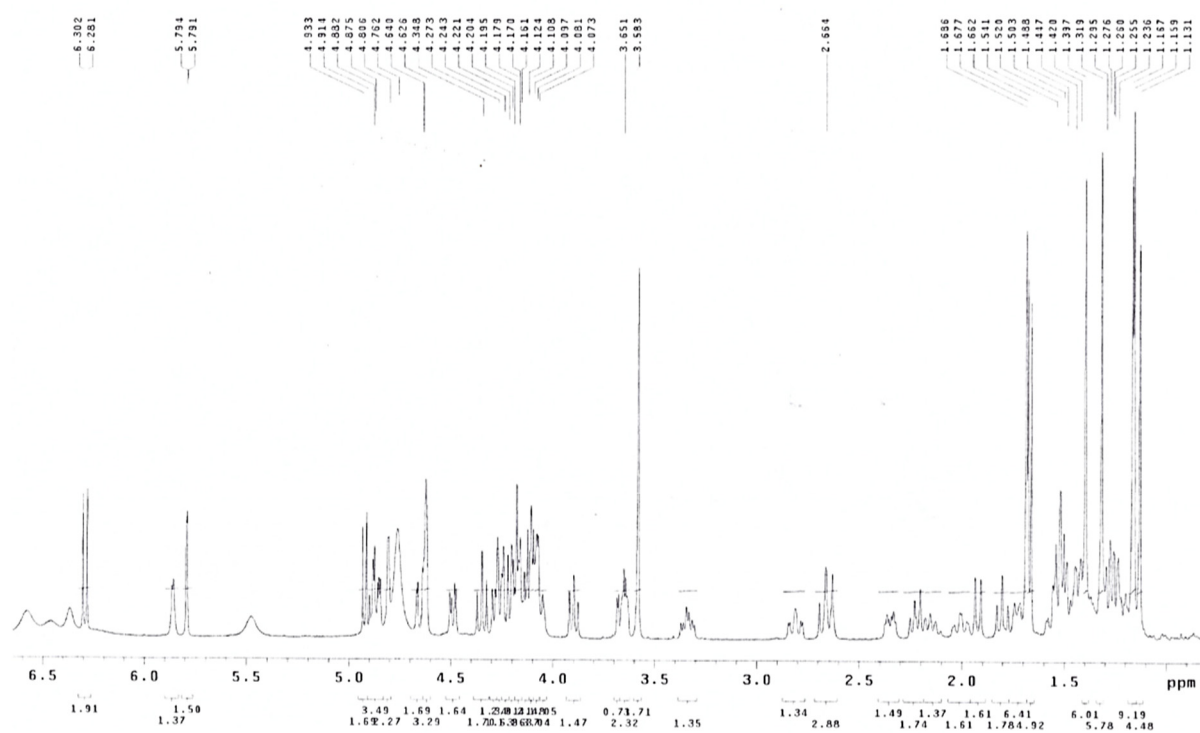

## $^{13}\text{C}$ NMR of Acanthosessilioside M

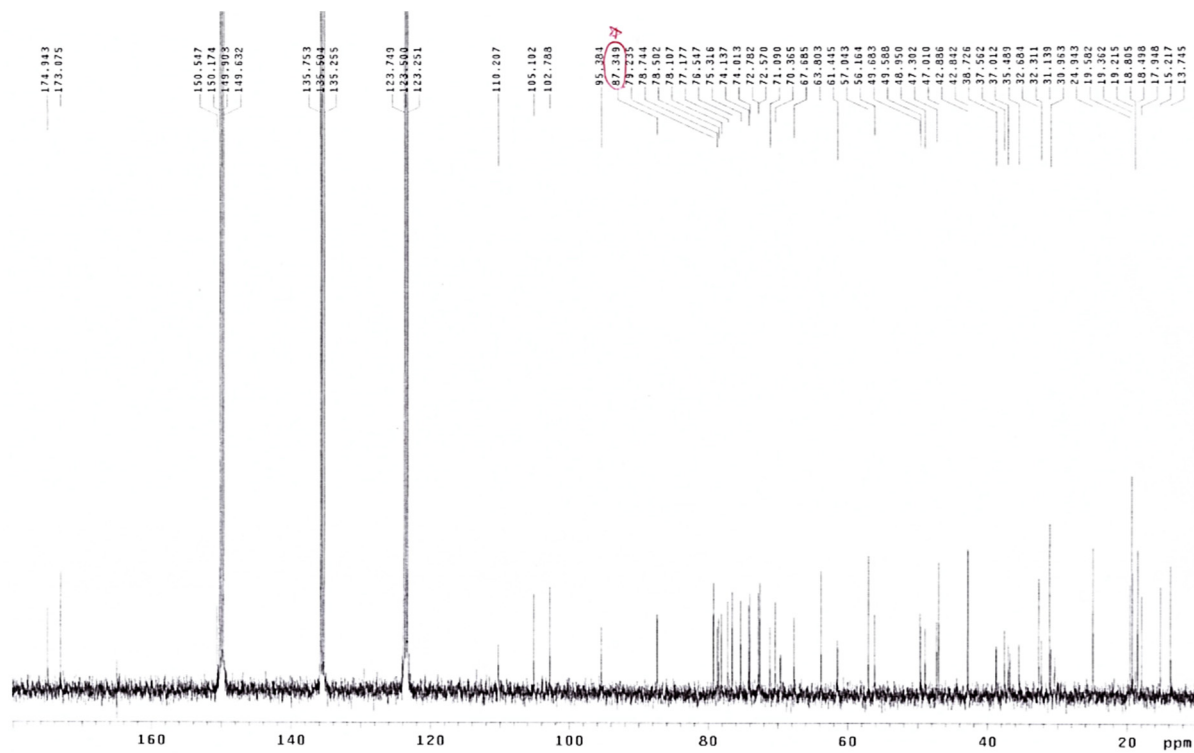

## Qtrap/MSMS of Acanthosessilioside M

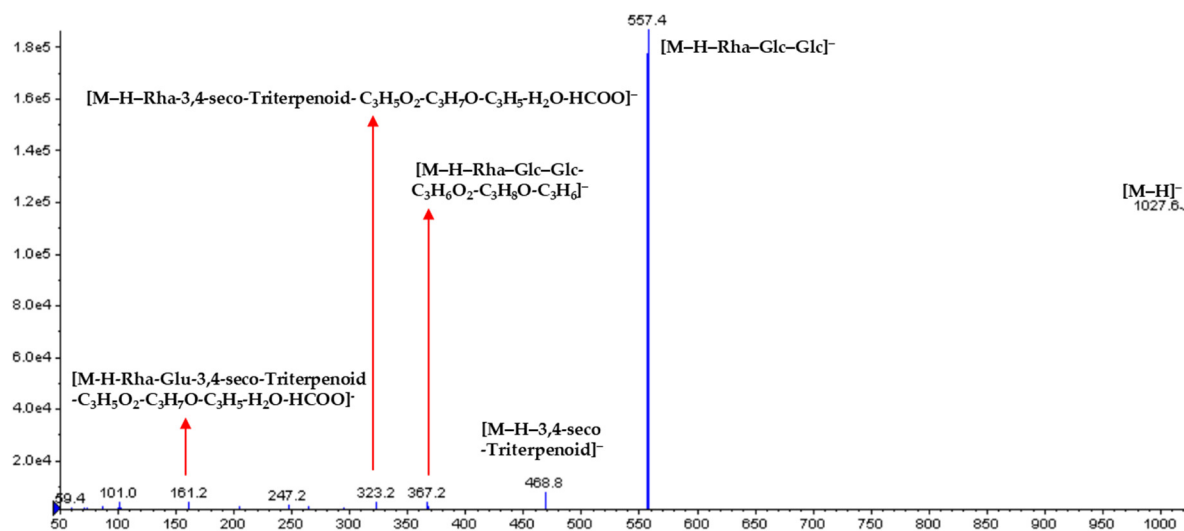

## HRESIMS of Acanthosessilioside M

Acanthopanax\_25ppm\_B10

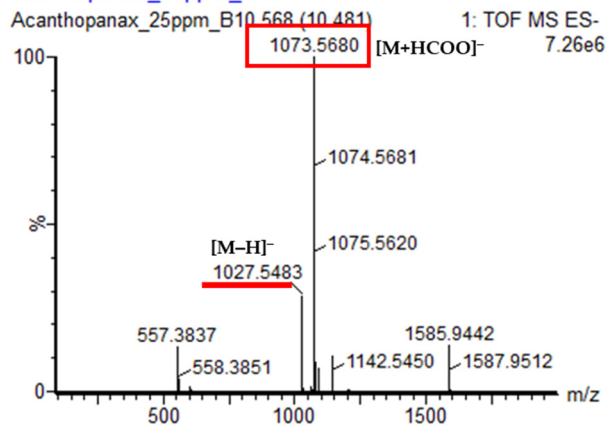



S8:  $^1\text{H}$ ,  $^{13}\text{C}$  NMR, Qtrap/MSMS, and HRESIMS of Acanthosessilioside N

$^1\text{H}$  NMR of Acanthosessilioside N

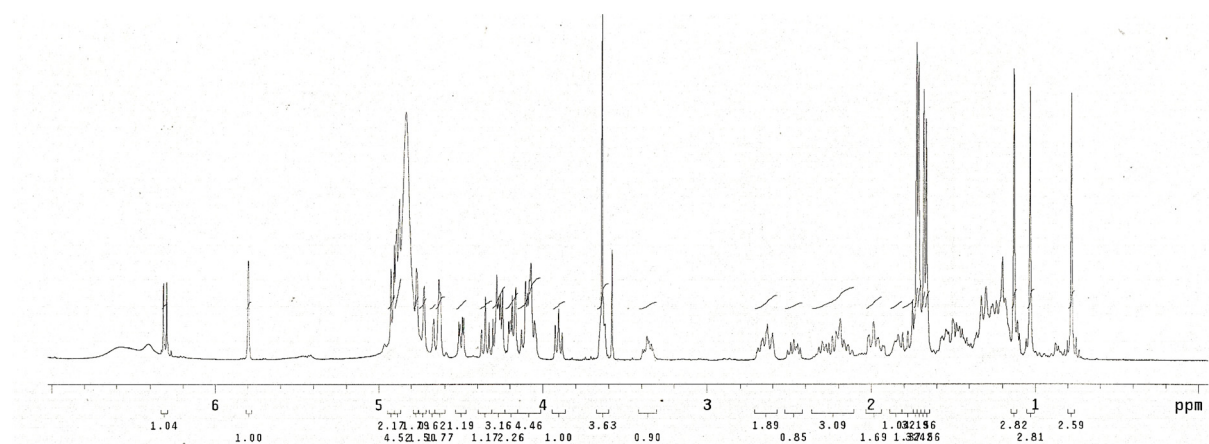

$^{13}\text{C}$  NMR of Acanthosessilioside N

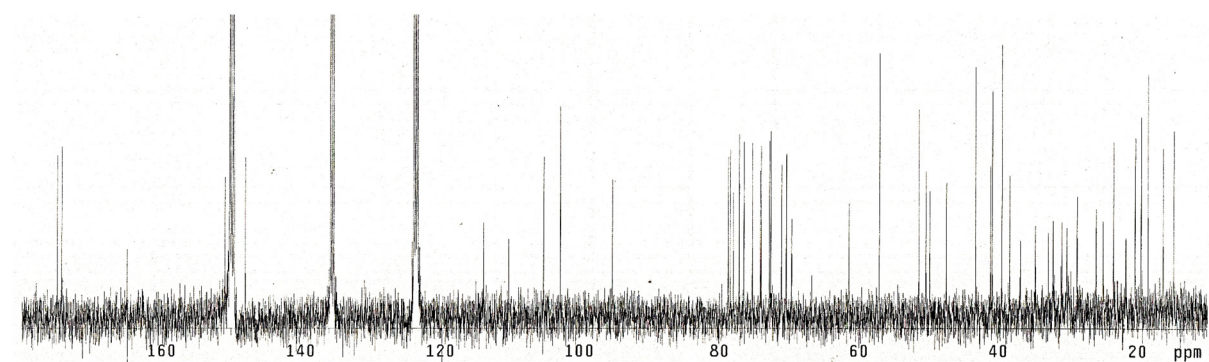



## Qtrap/MSMS of Acanthosessilioside N

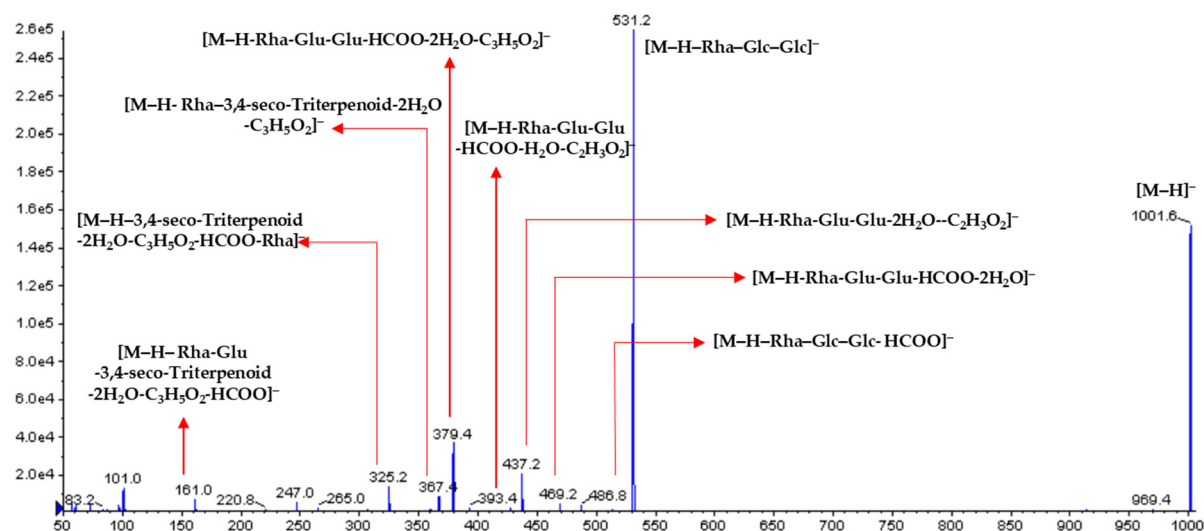

## HRESIMS of Acanthosessilioside N

Acanthopanax\_25ppm\_B11

Acanthopanax\_25ppm\_B11.262 (4.845)

1: TOF MS ES- 7.31e6

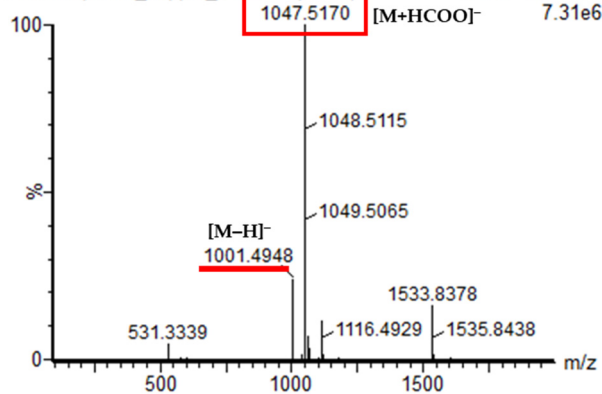

# S9: $^1\text{H}$ , $^{13}\text{C}$ NMR, Qtrap/MSMS, and HRESIMS of Acanthosessilioside O

## $^1\text{H}$ NMR of Acanthosessilioside O

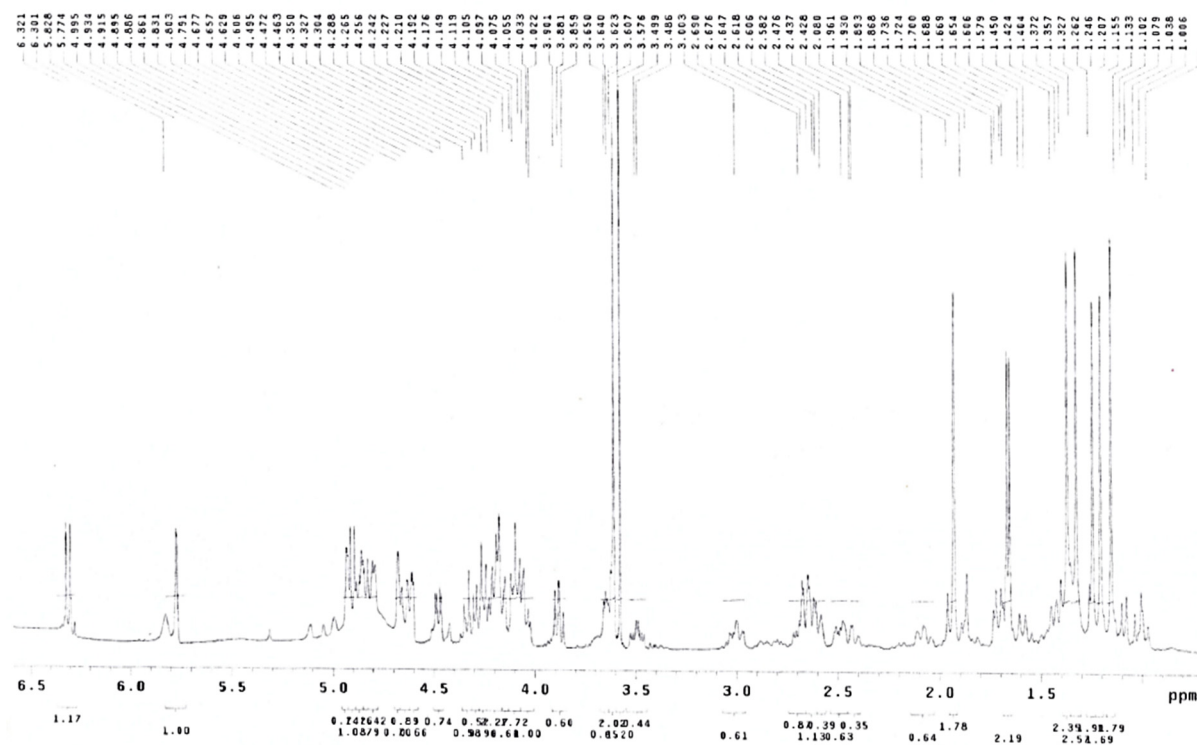

## $^{13}\text{C}$ NMR of Acanthosessilioside O

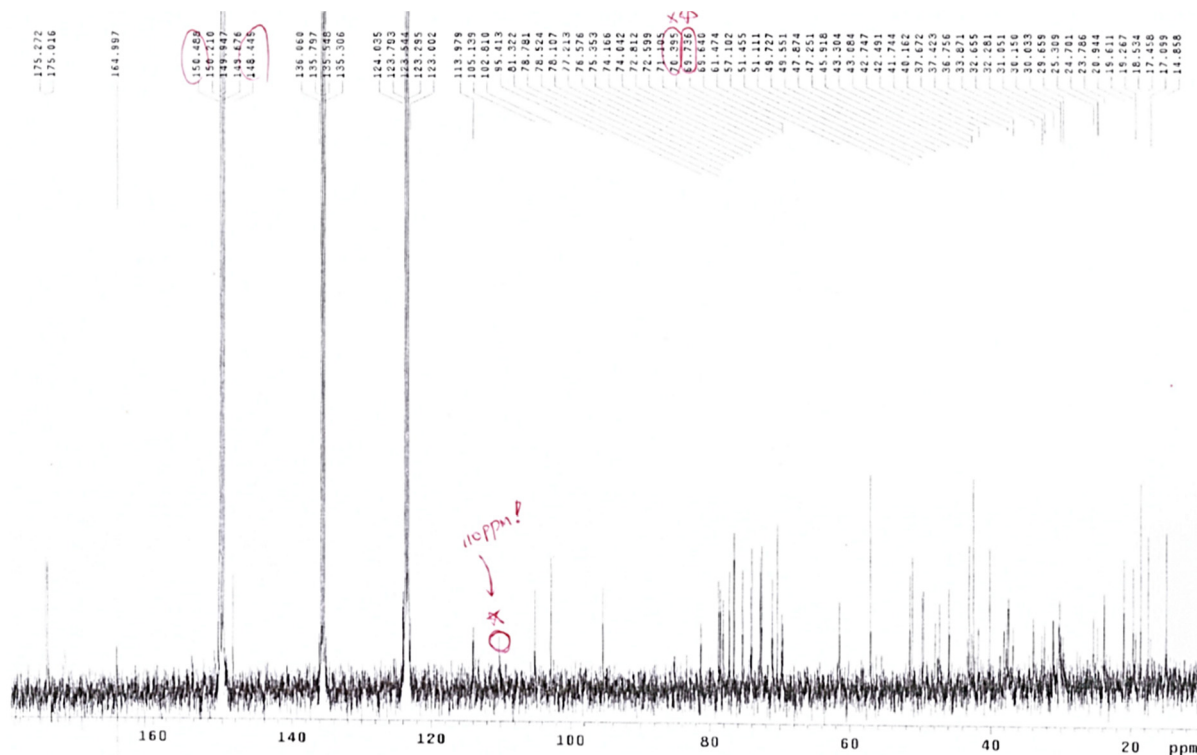

## Qtrap/MSMS of Acanthosessilioside O

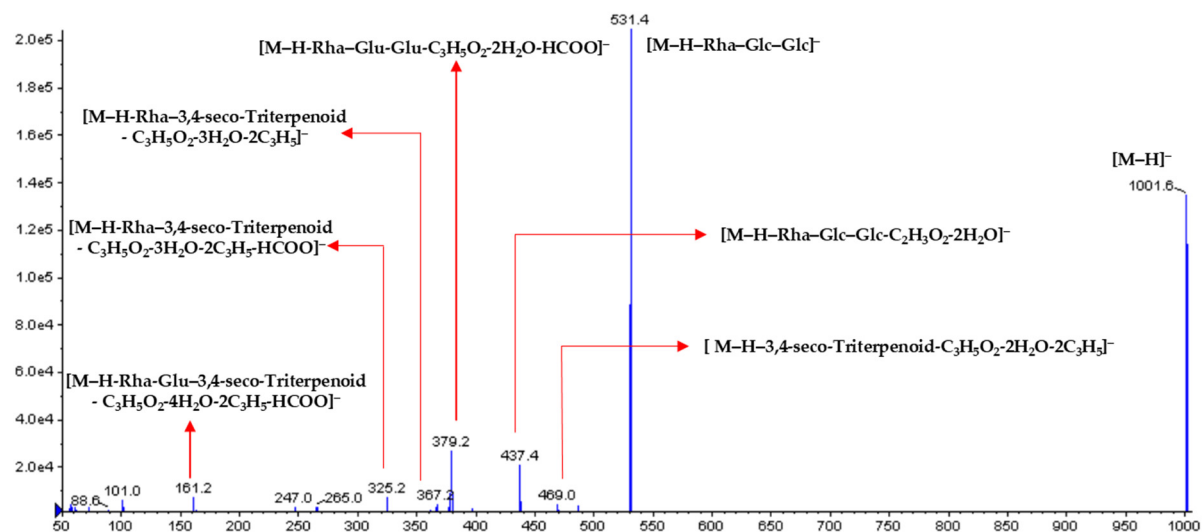

## HRESIMS of Acanthosessilioside O

Acanthopanax\_25ppm\_B12

Acanthopanax\_25ppm\_B12\_262 (4.845)

1: TOF MS ES- 6.64e6

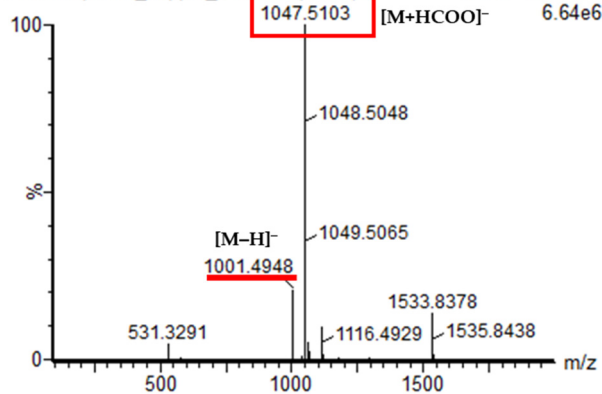

Supplement: s1 [file s1]
